# Supplementary material for: Screening the deep eutectic electrolytes for supercapacitors with alleviated self-discharge
Source: Royal Society of Chemistry journal article supplement (doi:10.1039/d3ya00390f), 2023-01-01
Supplement: d3ya00390f1.pdf [file d3ya00390f1.pdf]

## **Screening the deep eutectic electrolytes for supercapacitors with alleviated self-discharge**

Wenxia Huang, Xiaohui Yan, Yige Xiong, Qihui Guo, Xin Zhang, Fengyu Huang,  
Houqiang Shi, Xiang Ge\*

Department of Materials and Metallurgy, Guizhou University, Guiyang, Guizhou 550025,  
China

\*Corresponding Author

E-mail: [xge@gzu.edu.cn](mailto:xge@gzu.edu.cn)

**Table of content in the supporting data:**

**Table S1.** Viscosity, conductivity and density of DESs

**Figure S1.** XRD pattern of the AC

**Figure S2.** SEM and TEM images of the AC

**Figure S3.** N<sub>2</sub> adsorption/desorption profile and pore size distribution (PSD) curve of the AC

**Figure S4.** The CV curves at different scan rates of the symmetrical supercapacitors based on various DESs electrolytes.

**Figure S5.** The cycling and charge/discharge curves of the symmetrical supercapacitors based on DESs electrolytes.

**Table S1.** Viscosity, conductivity and density of DESs

| HBD                                                                                 |                        | ChCl:H<br>BD<br>(molar<br>ratio) | Viscosity<br>at 18°C<br>(cP) | Density<br>at 25°C<br>(g/cm <sup>3</sup> ) | Conductivity<br>at 25°C<br>(μS/cm) | 15h<br>Voltage<br>retention<br>rate |
|-------------------------------------------------------------------------------------|------------------------|----------------------------------|------------------------------|--------------------------------------------|------------------------------------|-------------------------------------|
| 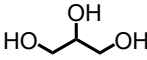   | Glycerol<br>(Gly)      | 1:2                              | 290                          | 1.180                                      | 1562                               | 1                                   |
|    | Phenol                 | 1:2                              | 91                           | 1.045                                      | 1264                               | 2                                   |
|    | Acetamide<br>(Ace)     | 1:2                              | Solid                        | 1.007                                      | Solid                              | 3                                   |
|   | Urea                   | 1:2                              | 295                          | 1.132                                      | 821                                | 4                                   |
|  | EG                     | 1:2                              | 51                           | 1.255                                      | 17368                              | 5                                   |
|  | Levulinic acid<br>(LA) | 1:2                              | 205                          | 1.247                                      | 1034                               | 6                                   |
|  | Malonic acid<br>(MA)   | 1:2                              | Solid                        | 1.358                                      | 320                                | 7                                   |
|  | Oxalic acid<br>(OA)    | 1:2                              | 19945                        | 1.211                                      | 118                                | 8                                   |

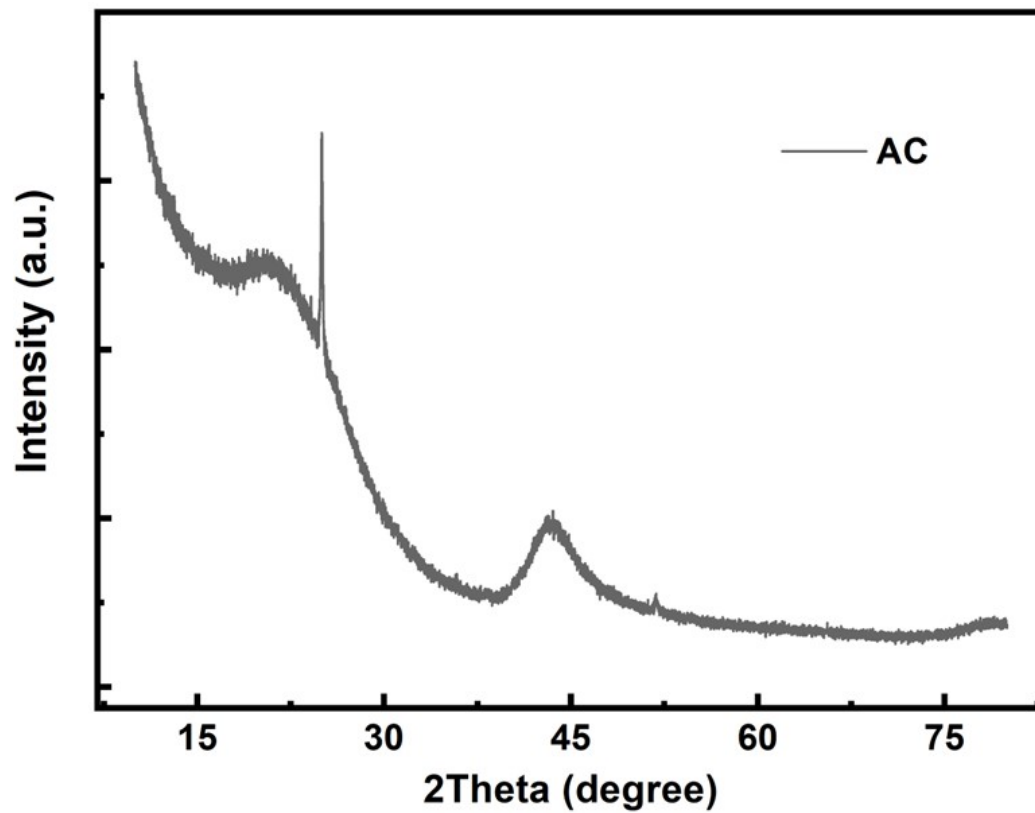

Figure S1. XRD pattern of the AC

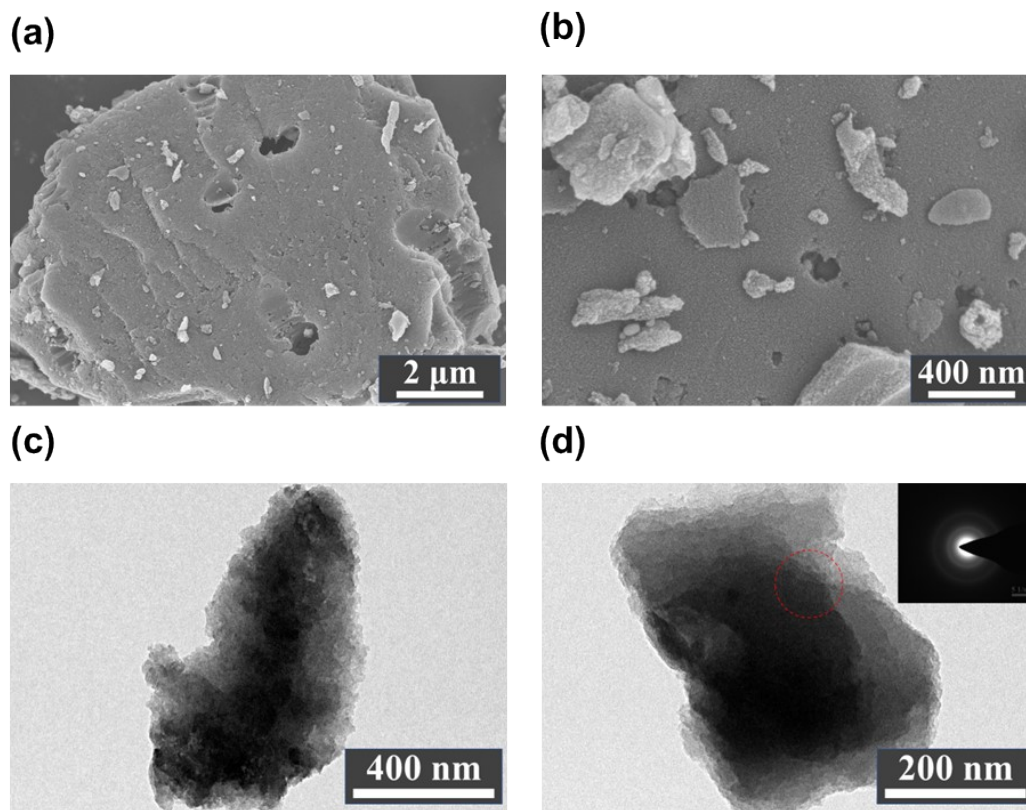

**Figure S2.** SEM and TEM images of the AC

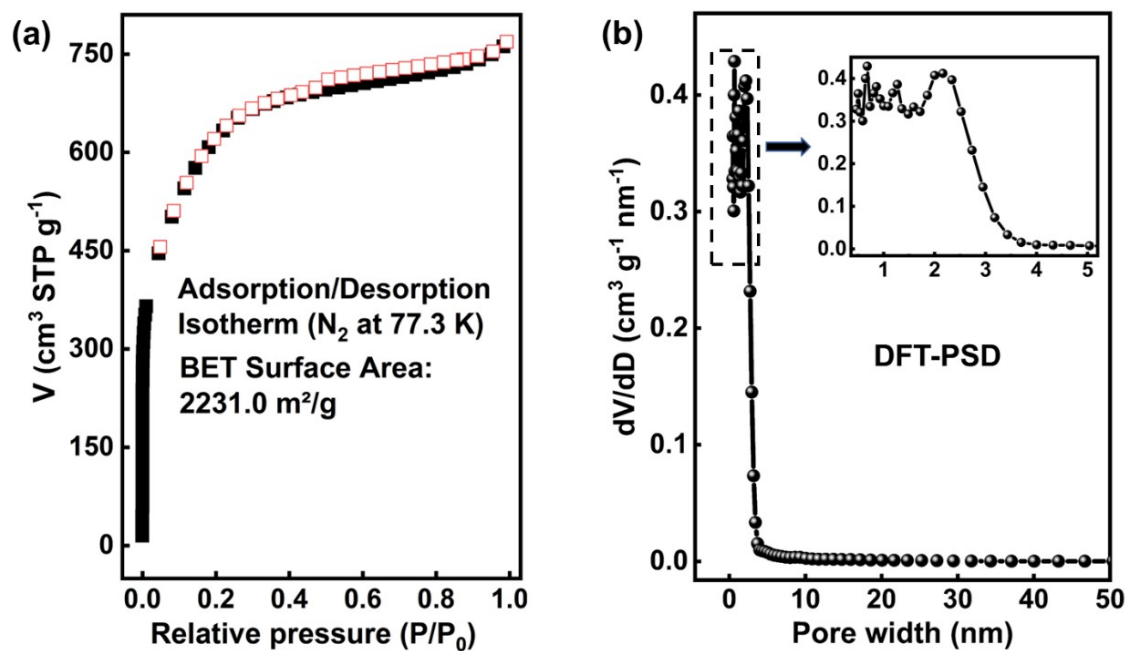

Figure S3.  $N_2$  adsorption/desorption profile and pore size distribution (PSD) of the AC

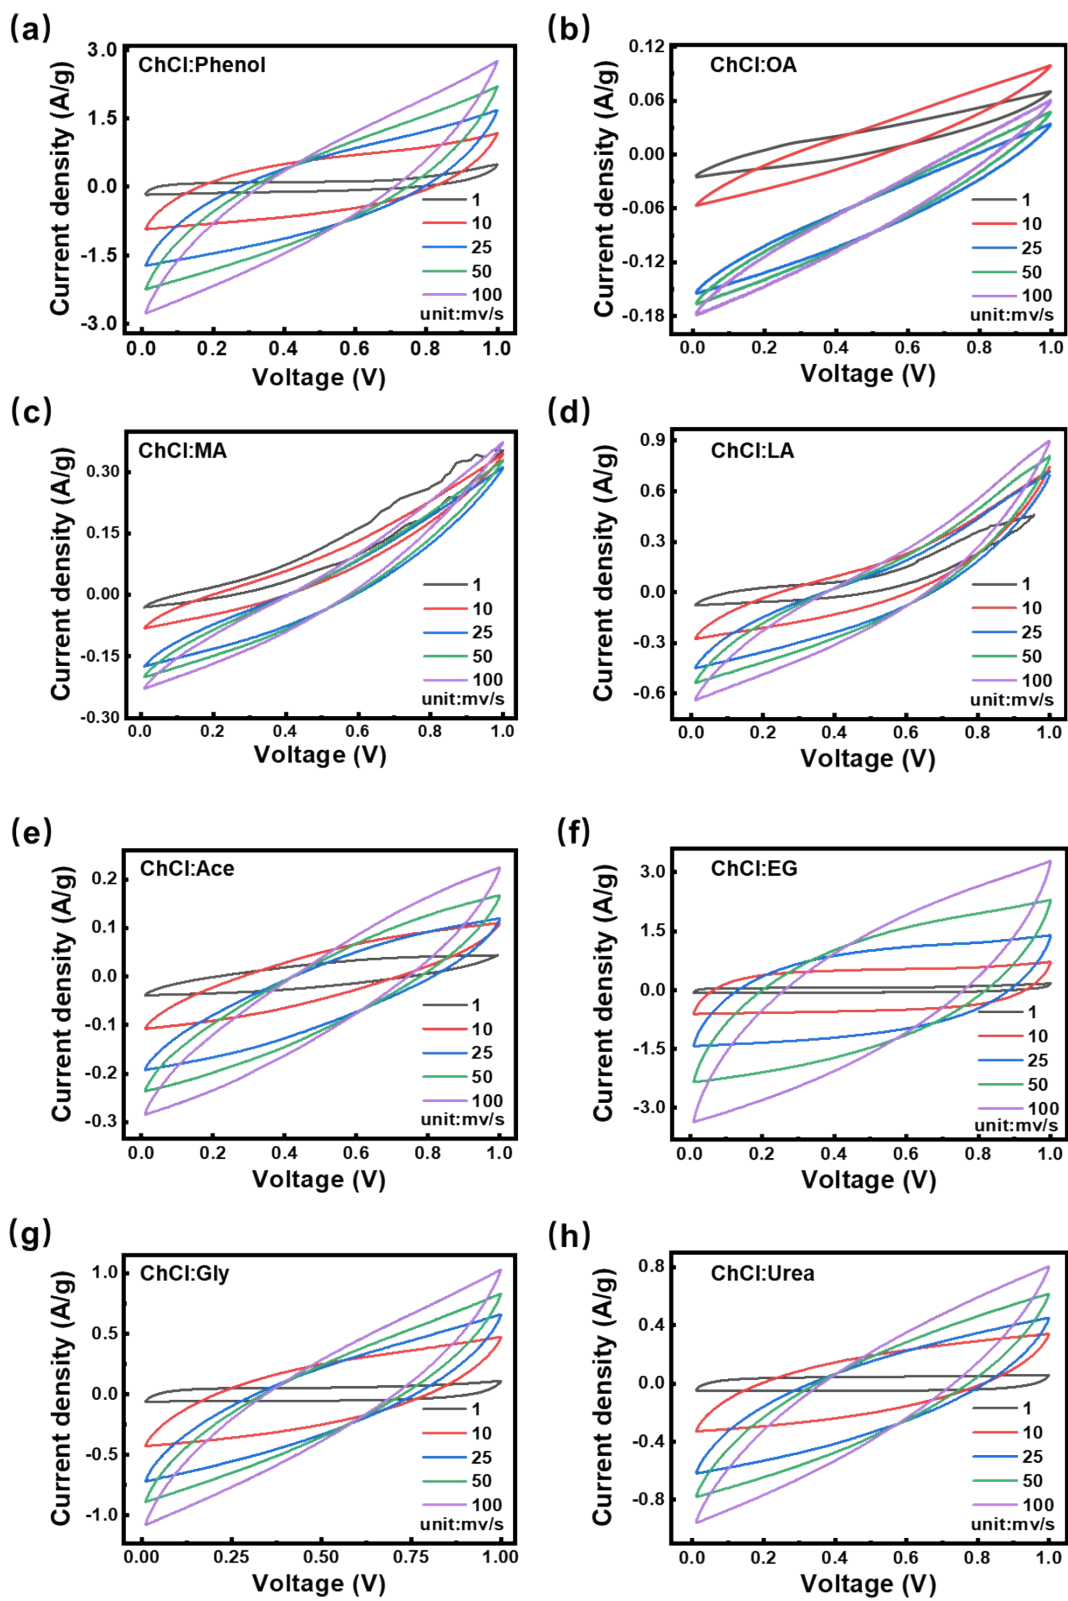

**Figure S4.** The CV curves at different scan rates of the symmetrical supercapacitors based on various DESs electrolytes.

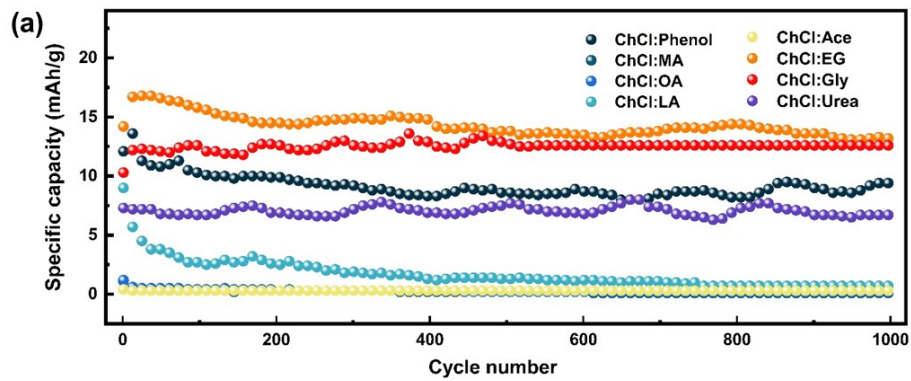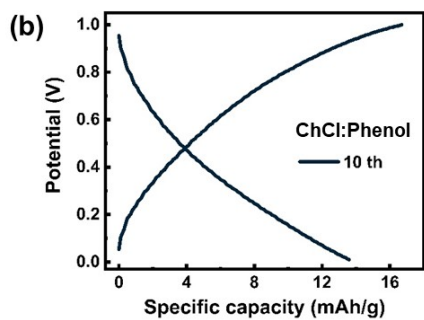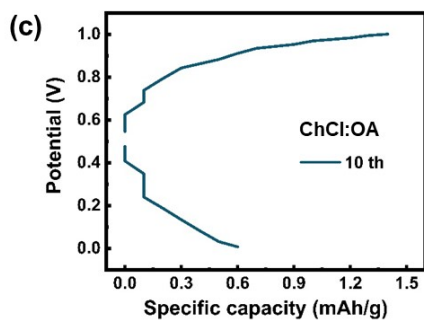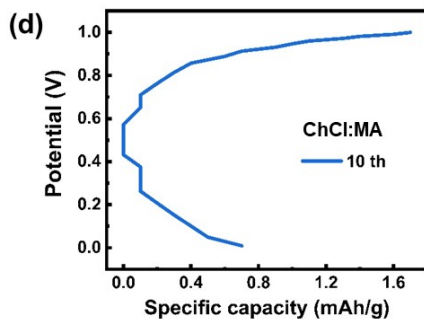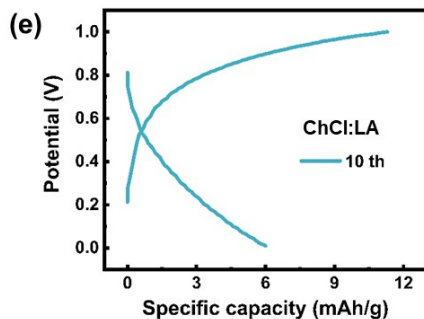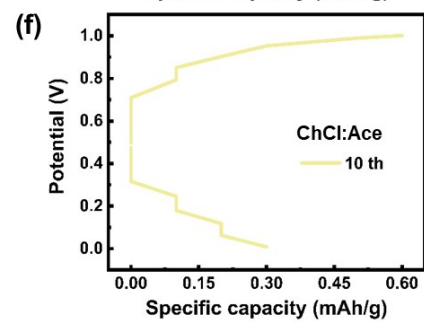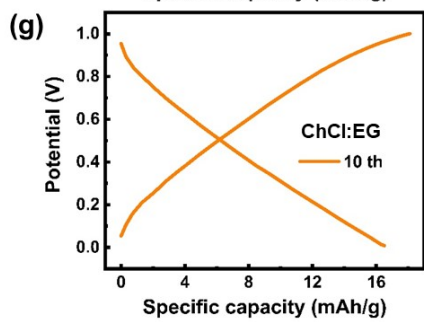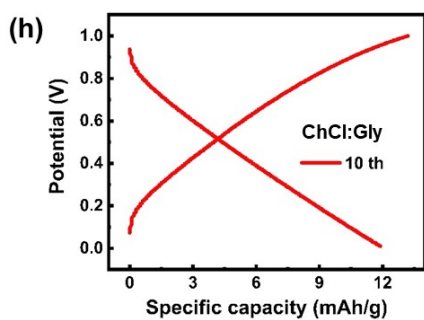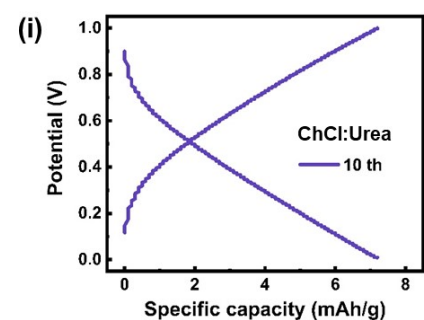



**Figure S5.** The cycling and charge/discharge curves of the symmetrical supercapacitors based on DESs electrolytes.
